# Supplementary material
Source: PubMed Central journal article supplement (PMC6320276)
Supplement: NIHMS1504509-supplement-1.pdf [file NIHMS1504509-supplement-1.pdf]

## IFN $\gamma$ and IL-10

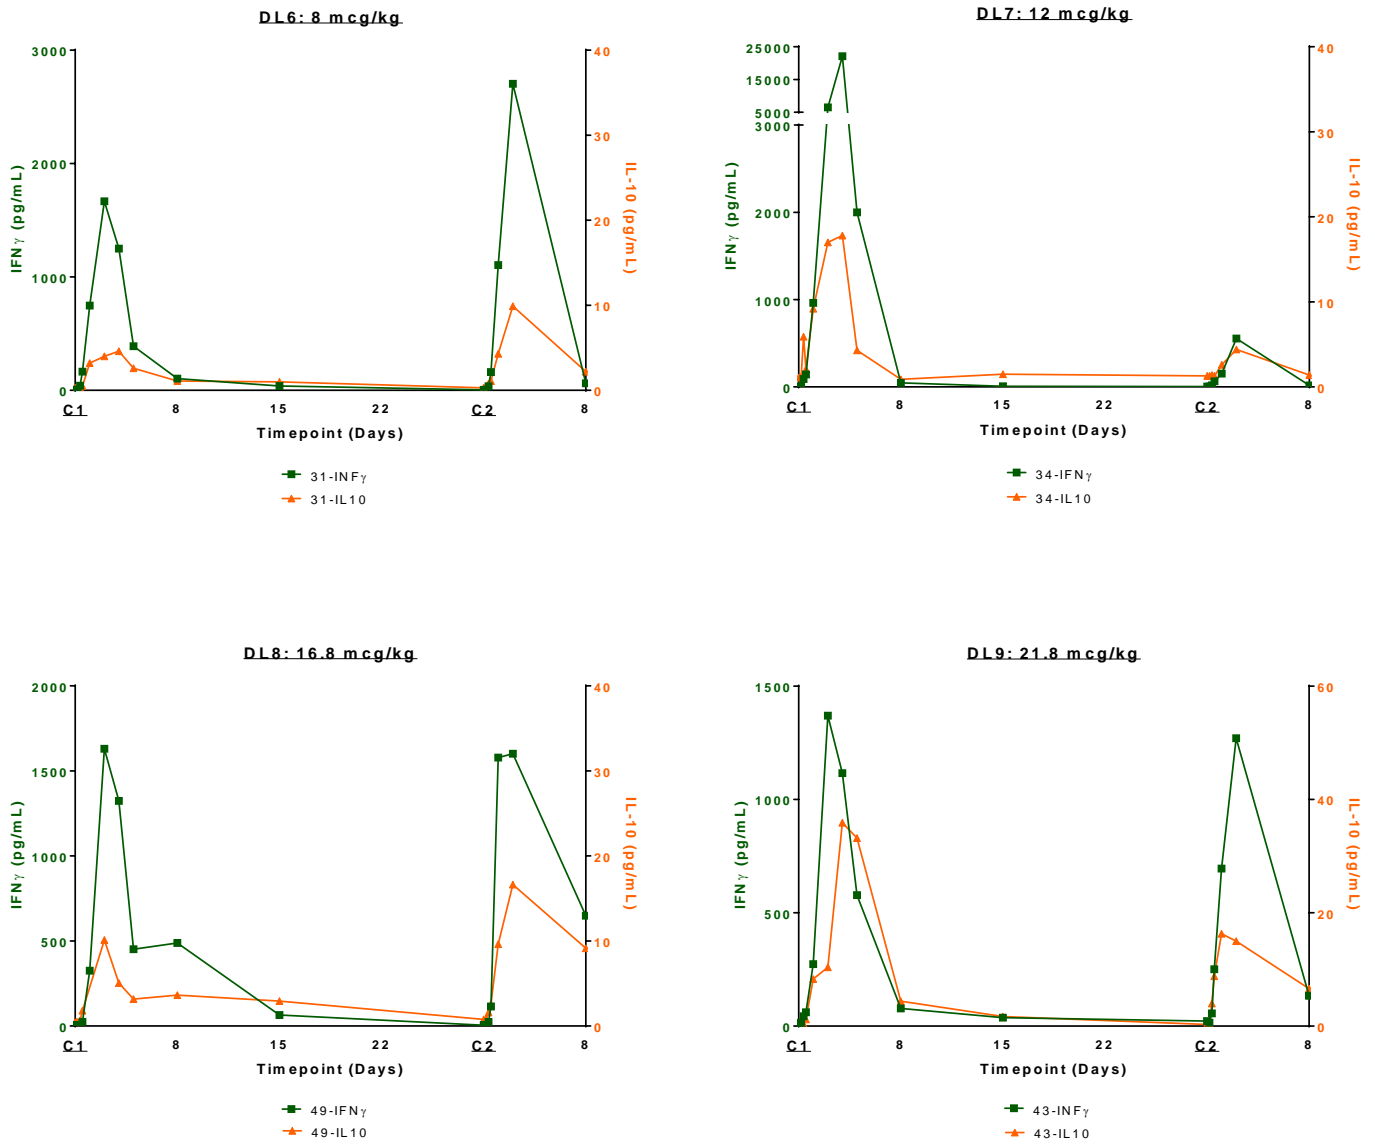

Supplementary Figure 1 demonstrates a time-dependent rise in IFN- $\gamma$  after administration of NHS-IL12, and an associated rise of IL-10 in a single patient at each of dose levels 6, 7, 8, and 9.

### DL6: 8 mcg/kg

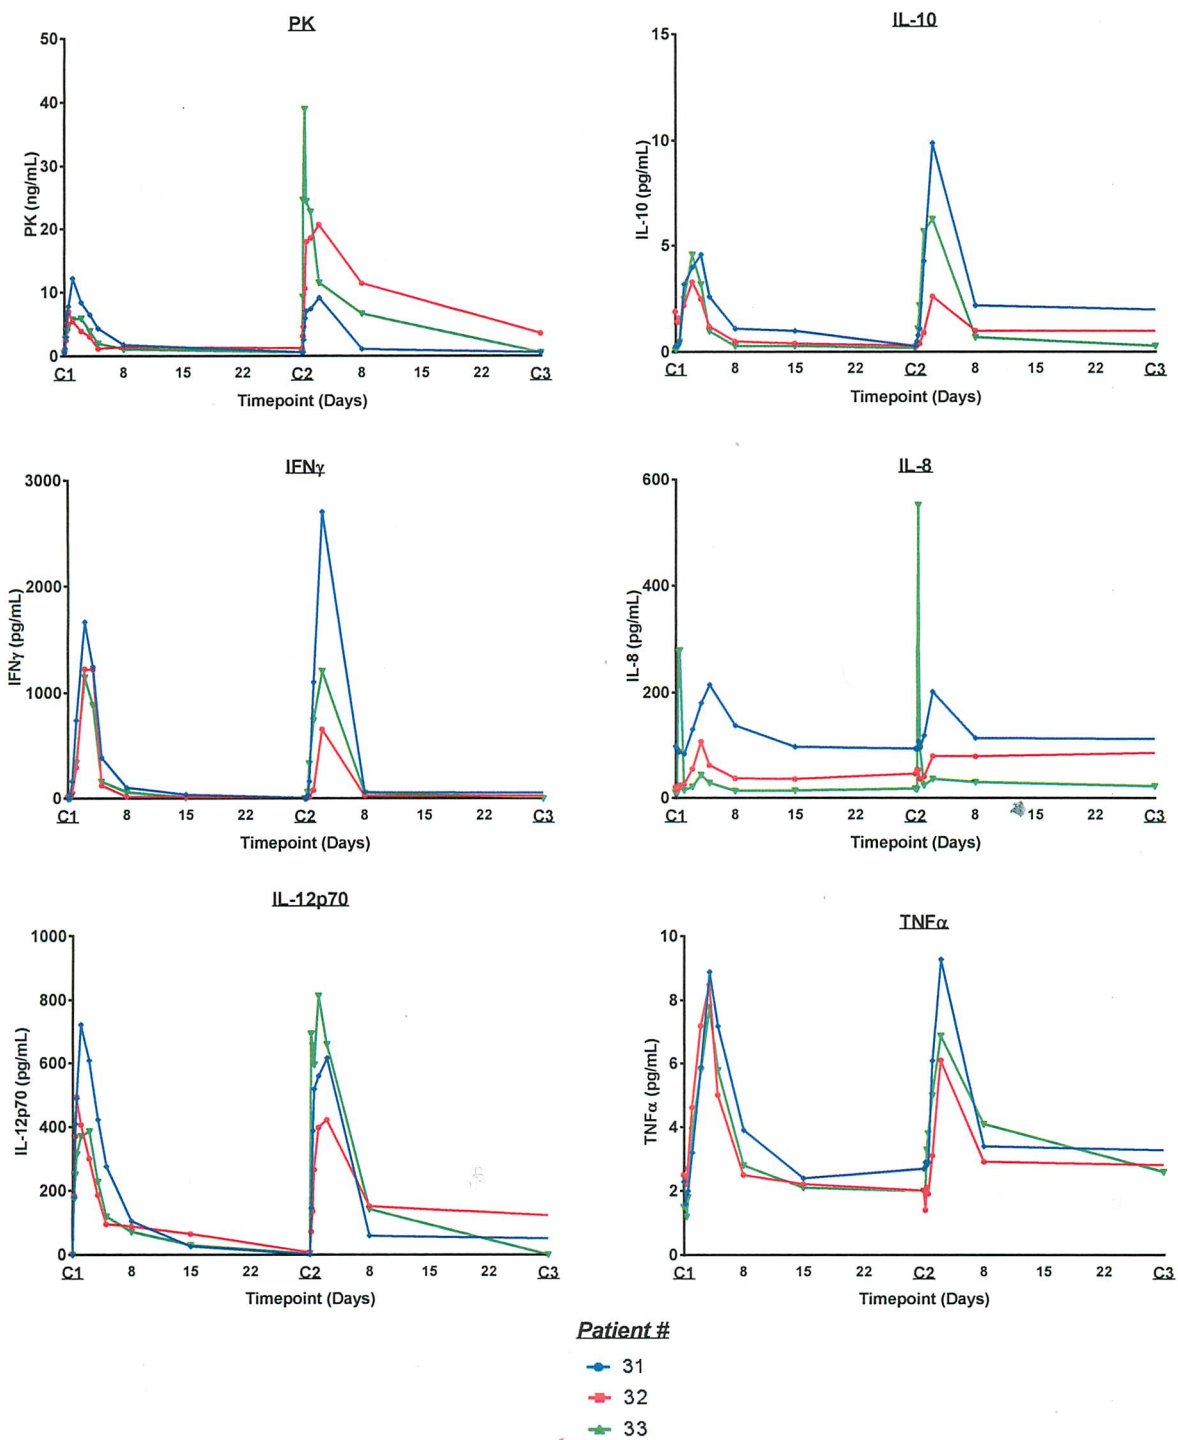

Supplementary Figure 2 shows the pharmacokinetic and pharmacodynamic results for dose level 6 of NHS-IL12.

### DL7: 12 mcg/kg

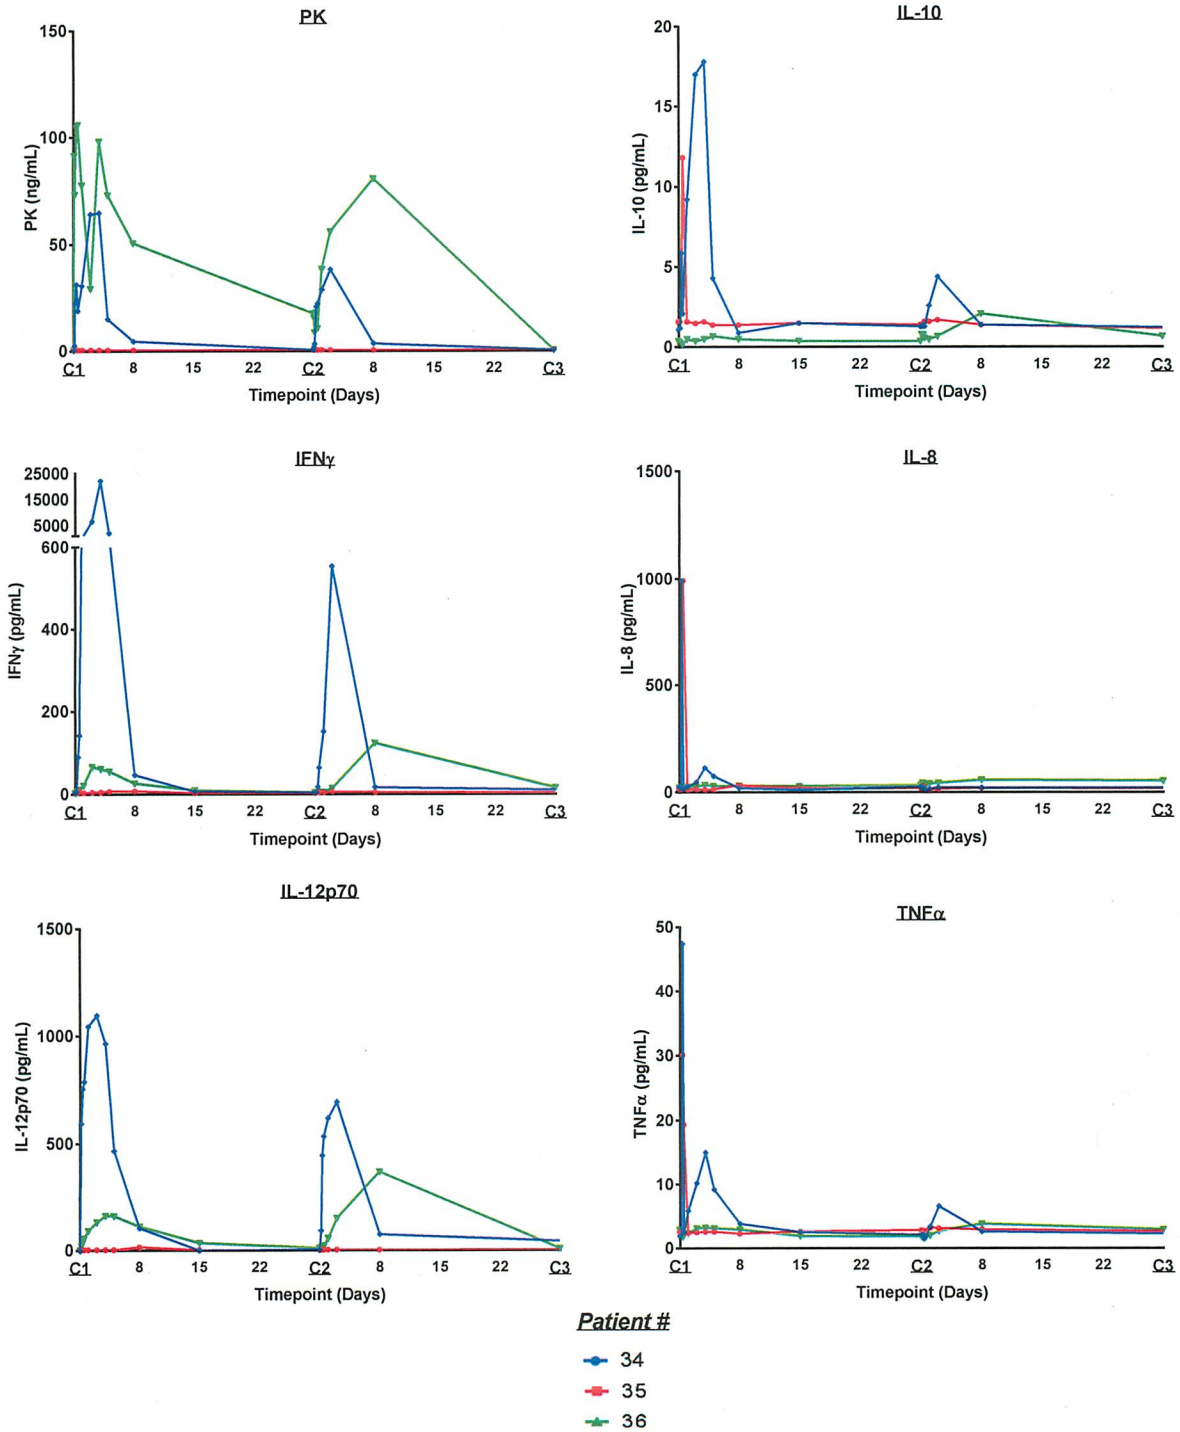

Supplementary Figure 3 shows the pharmacokinetic and pharmacodynamic results for dose level 7 of NHS-IL12.

### DL9: 21.8 mcg/kg

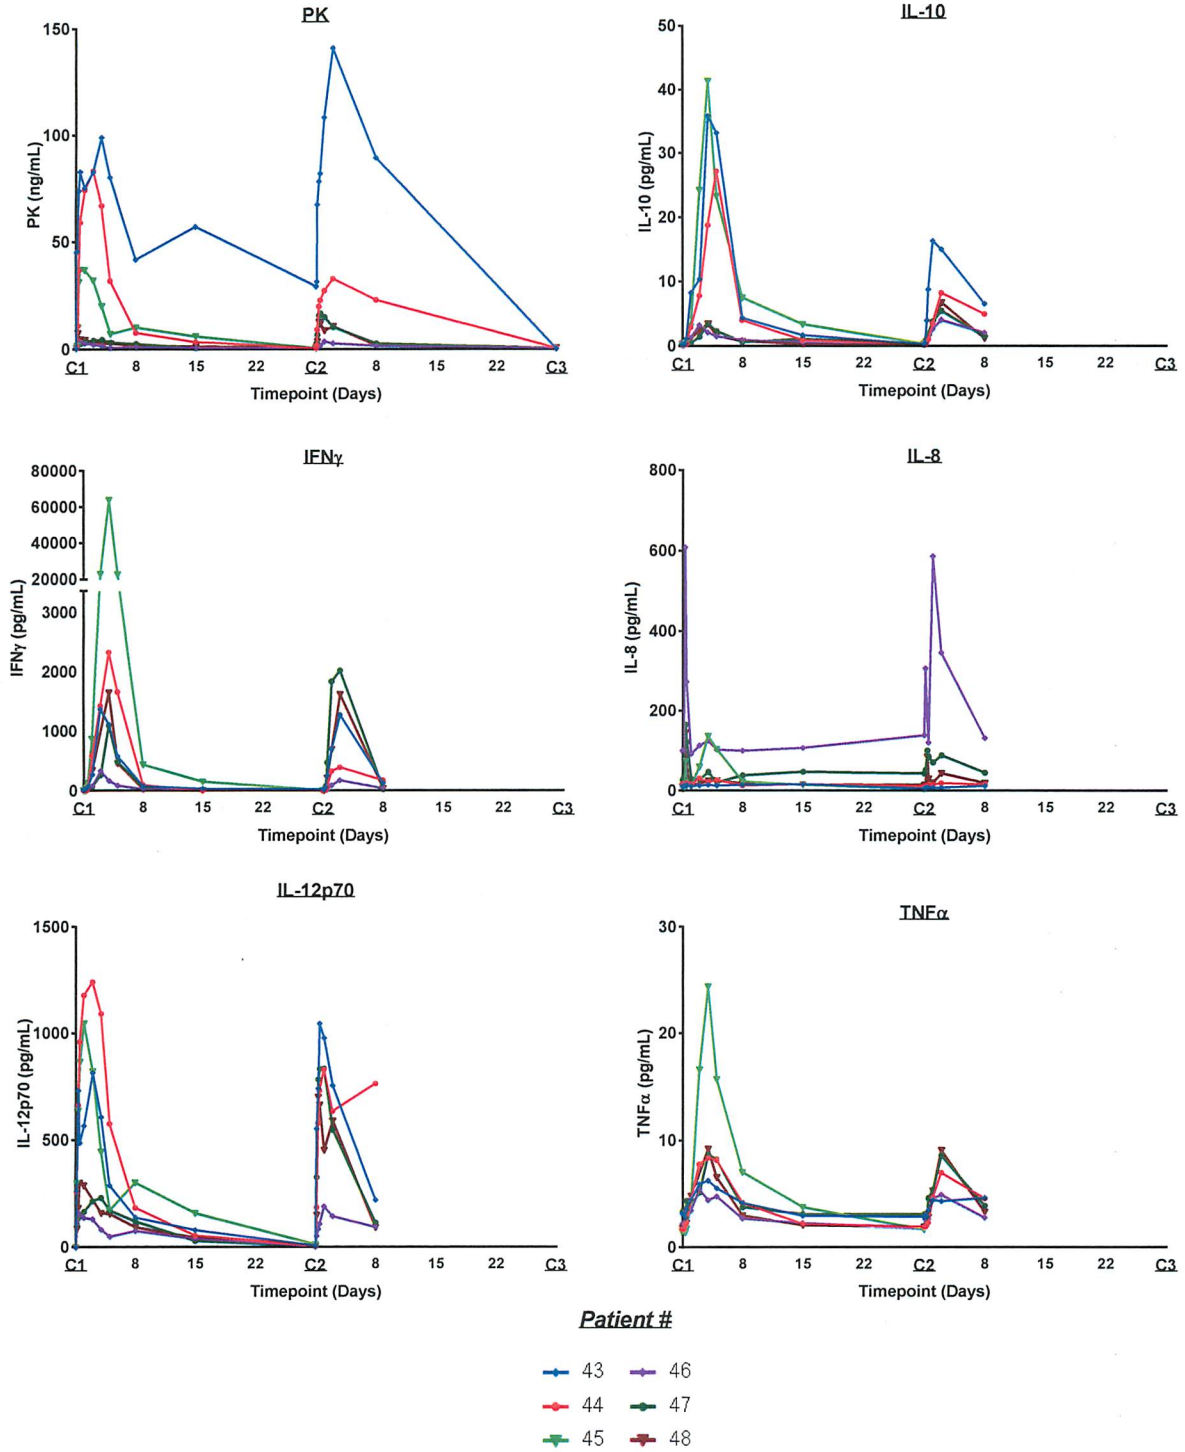

Supplementary Figure 4 shows the pharmacokinetic and pharmacodynamic results for dose level 9 of NHS-IL12.

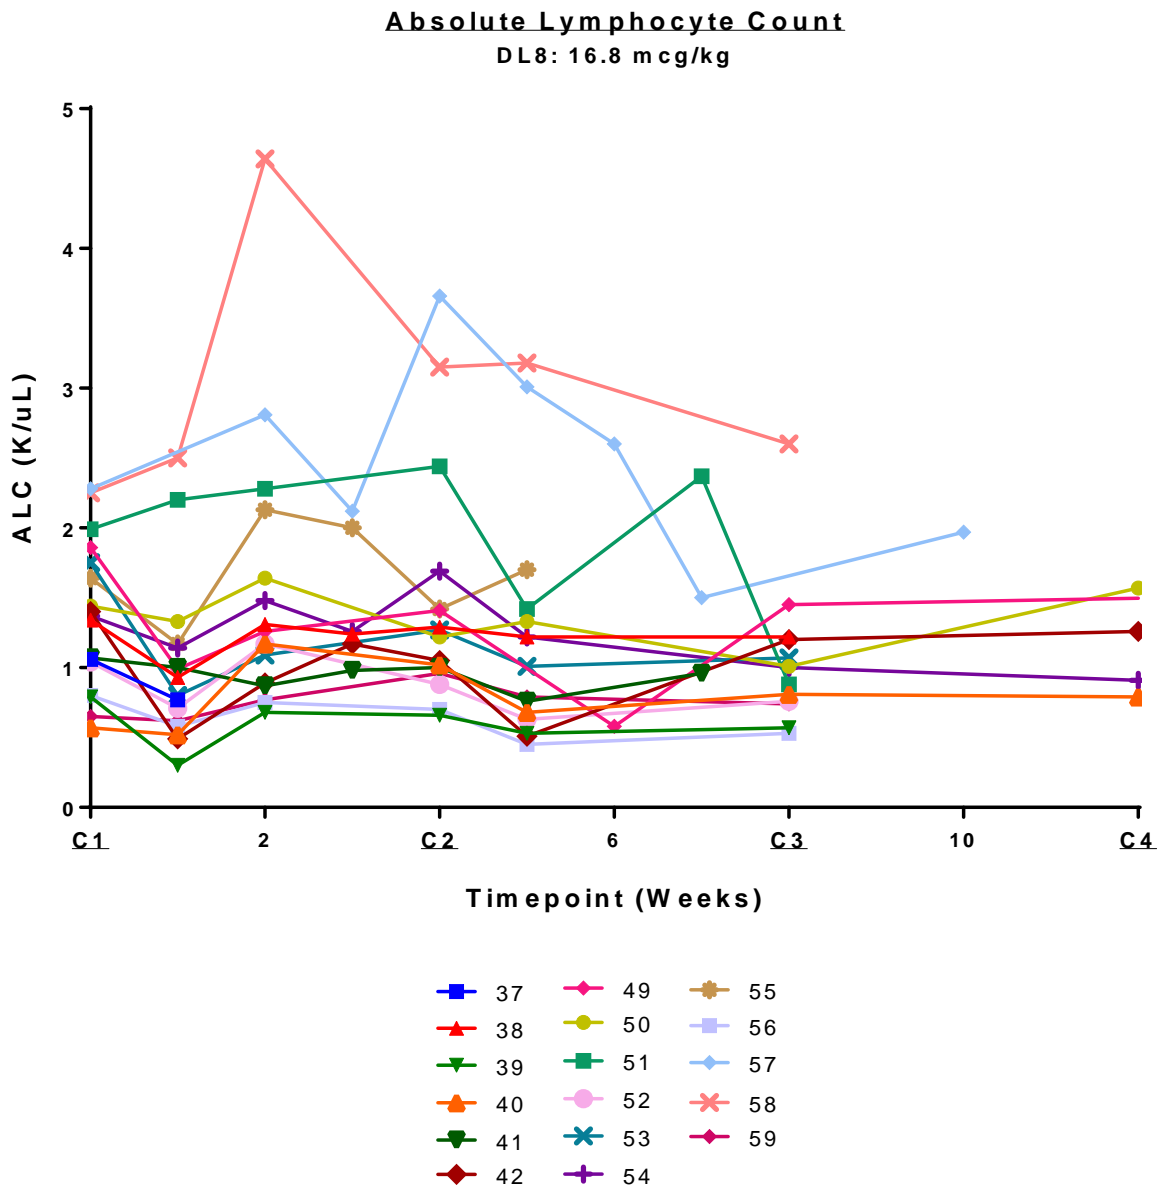

Supplementary Figure 5 shows the change in absolute lymphocyte count (ALC) for patients treated on dose level 8. A number of patients had a notable decrease in their ALC, all of which returned to baseline levels before the second cycle.

**Supplementary Table 1.**

**A: Individual pharmacokinetics (PK) parameters for NHS-IL12 and descriptive statistics by treatment group after single dose on day 1**

|                                | <b>t<sub>1/2</sub> (h)</b> | <b>C<sub>max</sub><br/>(ng/mL)</b> | <b>AUC<sub>0-168h</sub><br/>(h*ng/mL)</b> | <b>AUC<sub>0-∞</sub><br/>(h*ng/mL)</b> |
|--------------------------------|----------------------------|------------------------------------|-------------------------------------------|----------------------------------------|
| 0.5 µg/kg<br>(n = 1)<br>mean   | NC                         | 9.83                               | 24.78                                     | NC                                     |
| median                         | NC                         | 9.83                               | 24.78                                     | NC                                     |
| 1 µg/kg<br>(n = 2)<br>mean     | NC                         | 1.63                               | 80.92                                     | NC                                     |
| median                         | NC                         | 1.63                               | 80.92                                     | NC                                     |
| 2 µg/kg<br>(n = 5)<br>mean     | (n = 4)<br>84.72           | (n = 5)<br>9.84                    | (n = 5)<br>1034.84                        | (n = 4)<br>2885.44                     |
| median                         | 49.29                      | 3.65                               | 209.96                                    | 243.97                                 |
| 4 µg/kg<br>(n = 7)<br>mean     | (n = 5)<br>109.13          | (n = 7)<br>3.27                    | (n = 7)<br>250.59                         | (n = 5)<br>444.27                      |
| median                         | 84.19                      | 2.24                               | 212.72                                    | 465.36                                 |
| 8 µg/kg<br>(n = 6)<br>mean     | 184.61                     | 6.69                               | 605.05                                    | 1188.22                                |
| median                         | 131.25                     | 6.42                               | 491.38                                    | 945.19                                 |
| 12 µg/kg<br>(n = 4)<br>mean    | (n = 3)<br>211.30          | (n = 4)<br>44.80                   | (n = 4)<br>4217.18                        | (n = 3)<br>12115.81                    |
| median                         | 191.19                     | 34.56                              | 2565.61                                   | 929.53                                 |
| 16.8 µg/kg<br>(n = 13)<br>mean | (n = 11)<br>379.16         | (n = 13)<br>24.16                  | (n = 6)<br>2049.71                        | (n = 11)<br>3152.197                   |
| median                         | 163.68                     | 8.99                               | 1211.03                                   | 1796.47                                |
| 21.8 µg/kg<br>(n = 6)<br>mean  | 200.84                     | 39.11                              | 3944.71                                   | 12200.80                               |
| median                         | 144.95                     | 22.27                              | 1817.03                                   | 3254.14                                |

**B: Individual PK parameters for NHS-IL12 and descriptive statistics by treatment group after multiple doses on day 29**

|  | <b>t<sub>1/2</sub> (h)</b> | <b>C<sub>max</sub><br/>(ng/mL)</b> | <b>AUC<sub>0-168h</sub><br/>(h*ng/mL)</b> | <b>AUC<sub>0-∞</sub><br/>(h*ng/mL)</b> |
|--|----------------------------|------------------------------------|-------------------------------------------|----------------------------------------|
|--|----------------------------|------------------------------------|-------------------------------------------|----------------------------------------|

|                                          |                               |                            |                                |                               |
|------------------------------------------|-------------------------------|----------------------------|--------------------------------|-------------------------------|
| 2 µg/kg<br>(n = 2)<br>mean<br>median     | (n = 1)<br>1307.33<br>1307.33 | (n = 2)<br>3.13<br>3.13    | (n = 2)<br>220.04<br>220.04    | (n = 1)<br>2101.45<br>2101.45 |
| 4 µg/kg<br>(n = 3)<br>mean<br>median     | (n = 1)<br>42.52<br>42.52     | (n = 3)<br>9.40<br>5.60    | (n = 3)<br>723.92<br>680.21    | (n = 1)<br>1407.66<br>1407.66 |
| 8 µg/kg<br>(n = 3)<br>mean<br>median     | (n = 1)<br>86.61<br>86.61     | (n = 3)<br>22.90<br>20.64  | (n = 3)<br>1824.96<br>2033.81  | (n = 1)<br>2807.26<br>2807.26 |
| 12 µg/kg<br>(n = 2)<br>mean<br>median    | NC<br>NC                      | (n = 2)<br>59.54<br>59.54  | (n = 2)<br>6407.76<br>6407.76  | NC<br>NC                      |
| 16.8 µg/kg<br>(n = 12)<br>mean<br>median | (n = 6)<br>207.65<br>113.58   | (n = 12)<br>29.93<br>11.80 | (n = 12)<br>2650.99<br>1266.24 | (n = 6)<br>2657.04<br>1920.55 |
| 21.8 µg/kg<br>(n = 5)<br>mean<br>median  | (n = 2)<br>102.24<br>102.24   | (n = 5)<br>41.40<br>16.88  | (n = 5)<br>5140.01<br>1292.68  | (n = 2)<br>1633.16<br>1633.16 |

NC, not calculable

**Supplementary Table 2.** Frequencies of nine standard immune cell subsets pre-treatment vs. post-2 cycles of NHS-IL12 for 13 subjects at dose level 8 (16.8 µg/kg)

| Immune cell subset | Day 1 (Pre-treatment) | Day 57 (Post-2 cycles) | <i>P</i> -value | Adjusted <i>P</i> -value |
|--------------------|-----------------------|------------------------|-----------------|--------------------------|
| CD4                | 15.9 (10.4-25.8)      | 18.0 (10.3-30.4)       | 0.79            | ns                       |
| CD8                | 13.7 (11.5-22.0)      | 13.2 (9.2-29.8)        | 0.64            | ns                       |
| Tregs              | 0.4 (0.2-0.5)         | 0.4 (0.2-0.5)          | >0.99           | ns                       |
| NK                 | 7.4 (4.8-9.3)         | 9.0 (3.6-13.8)         | 0.27            | ns                       |
| NKT                | 1.7 (0.8-5.3)         | 2.8 (1.1-6.2)          | 0.0017          | 0.007                    |
| cDC                | 0.9 (0.7-2.0)         | 0.8 (0.7-1.9)          | 0.27            | ns                       |
| pDC                | 0.3 (0.2-0.4)         | 0.3 (0.1-0.4)          | 0.38            | ns                       |
| B cells            | 6.9 (2.9-12.6)        | 5.7 (3.0-10.6)         | 0.64            | ns                       |
| MDSC               | 13.7 (3.9-22.0)       | 7.5 (1.8-19.4)         | 0.68            | ns                       |

Flow cytometry was performed to evaluate 123 discrete immune cell subsets, including nine standard subsets (shown) and 114 refined subsets, as described in the Methods section. Values shown are the frequencies out of all PBMC, with median and interquartile range (IQR).

Tregs, regulatory T cells

NK, natural killer cells

NKT, natural killer T cells

cDC, conventional dendritic cells

pDC, plasmacytoid dendritic cells

MDSC, myeloid-derived suppressor cells

ns, not significant



**Supplementary Table 3: Toxicity trends through Cycle 4 in the multi-dose patients**

|                  | <b>All Events/Cycle (% of Pts)</b>      |                |                |
|------------------|-----------------------------------------|----------------|----------------|
| <b>Cycle (n)</b> | <b>Grade 1</b>                          | <b>Grade 2</b> | <b>Grade 3</b> |
| 1 (37)           | 3.5 (81.1)                              | 1.3 (64.9)     | 0.4 (27.0)     |
| 2 (32)           | 2 (71.9)                                | 0.6 (46.9)     | 0.03 (3.1)     |
| 3 (18)           | 0.9 (55.6)                              | 0.3 (22.2)     | 0.06 (5.6)     |
| 4 (12)           | 0.4 (41.7)                              | 0.3 (33.3)     | 0 (0)          |
|                  |                                         |                |                |
|                  | <b>Physical Events/Cycle (% of Pts)</b> |                |                |
| <b>Cycle (n)</b> | <b>Grade 1</b>                          | <b>Grade 2</b> | <b>Grade 3</b> |
| 1 (37)           | 1.2 (70.3)                              | 0.2 (13.5)     | 0.05 (5.4)     |
| 2 (32)           | 0.7 (50)                                | 0.09 (9.4)     | 0 (0)          |
| 3 (18)           | 0.4 (27.8)                              | 0 (0)          | 0 (0)          |
| 4 (12)           | 0.3 (25)                                | 0.2 (16.7)     | 0 (0)          |

The "Cycle" column indicates the number of subjects who completed each number of cycles. The data is shown as # events/cycle (% of patients experiencing toxicity). The upper table includes all adverse events (AEs) with an attribution of 3+, and the lower table shows only physical AEs such as fever or fatigue (no labs). Both events/cycle and % of patients experiencing AEs decreased between Cycle 1 and Cycle 2.
